# Supplementary material for: Epigenetic Targeting of Mcl-1 Is Synthetically Lethal with Bcl-xL/Bcl-2 Inhibition in Model Systems of Glioblastoma
Source: MDPI journal article supplement (doi:10.3390/cancers12082137), 2020-08-01

Figure 2e

U87

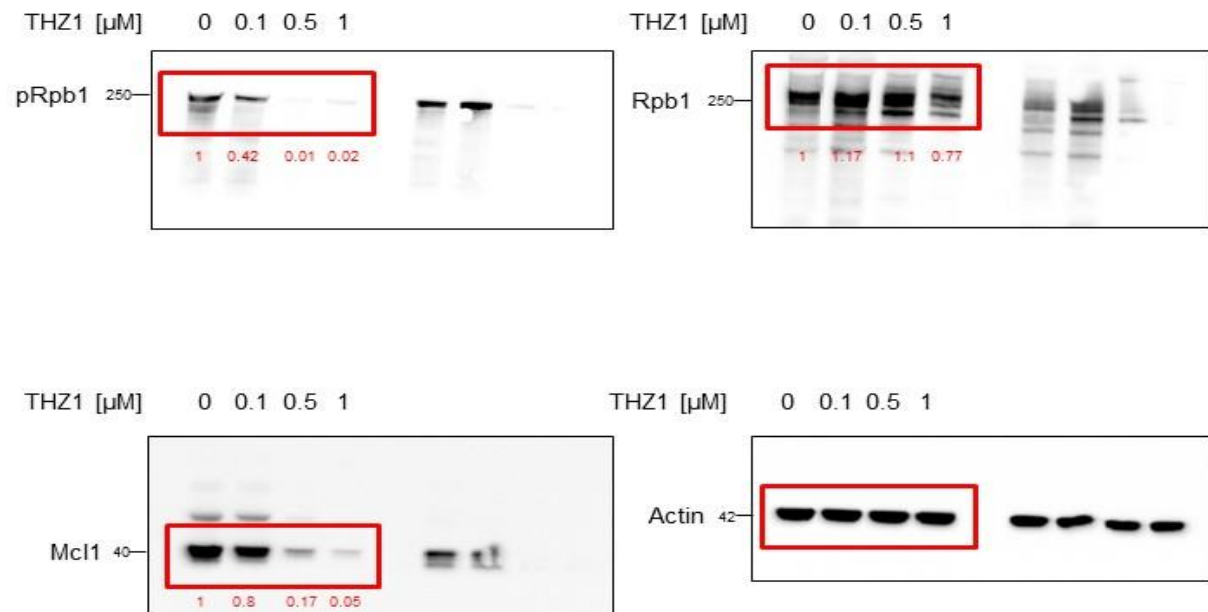

Figure 2e

GBM22

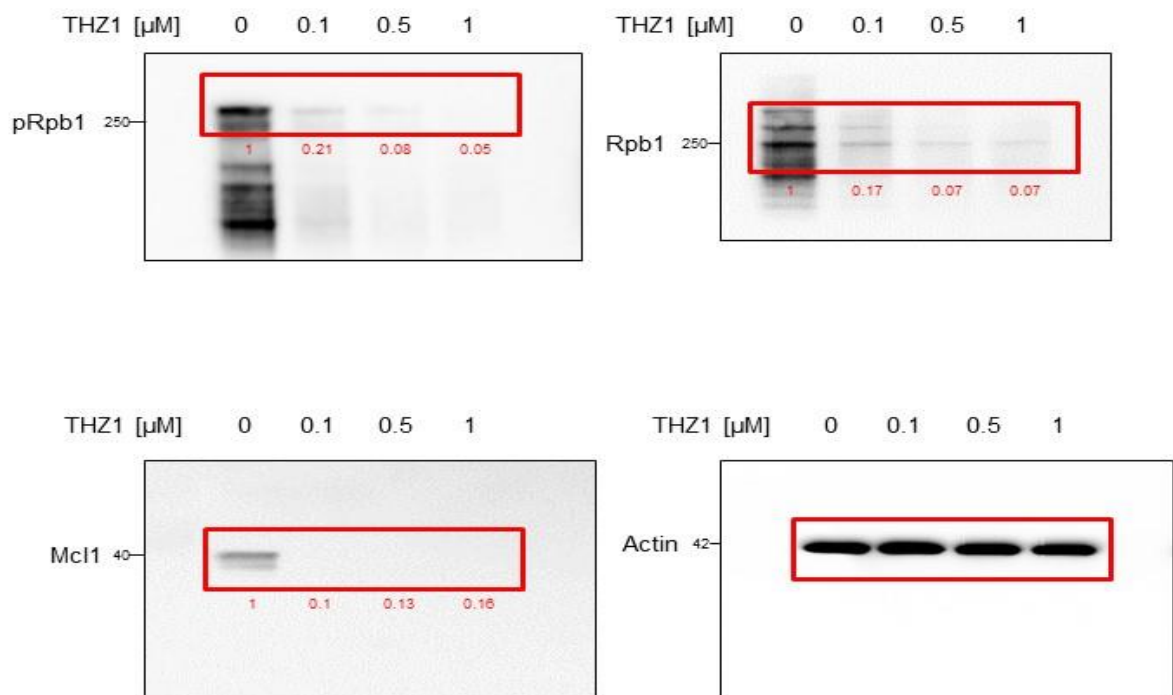

Figure 2f

U87, 24h

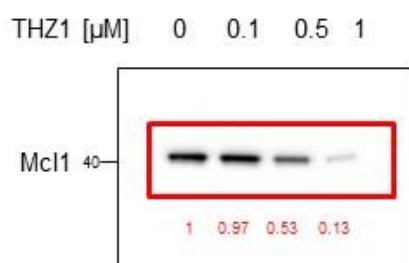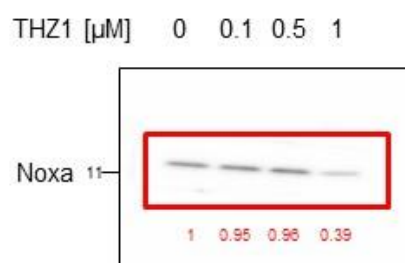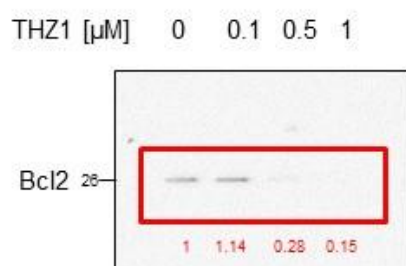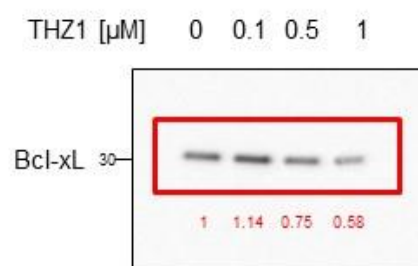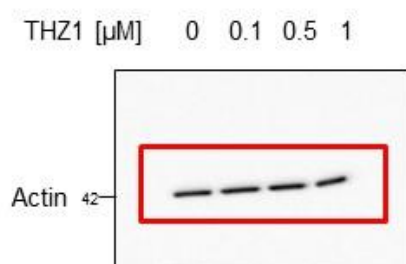

Figure 2f

U251, 24h

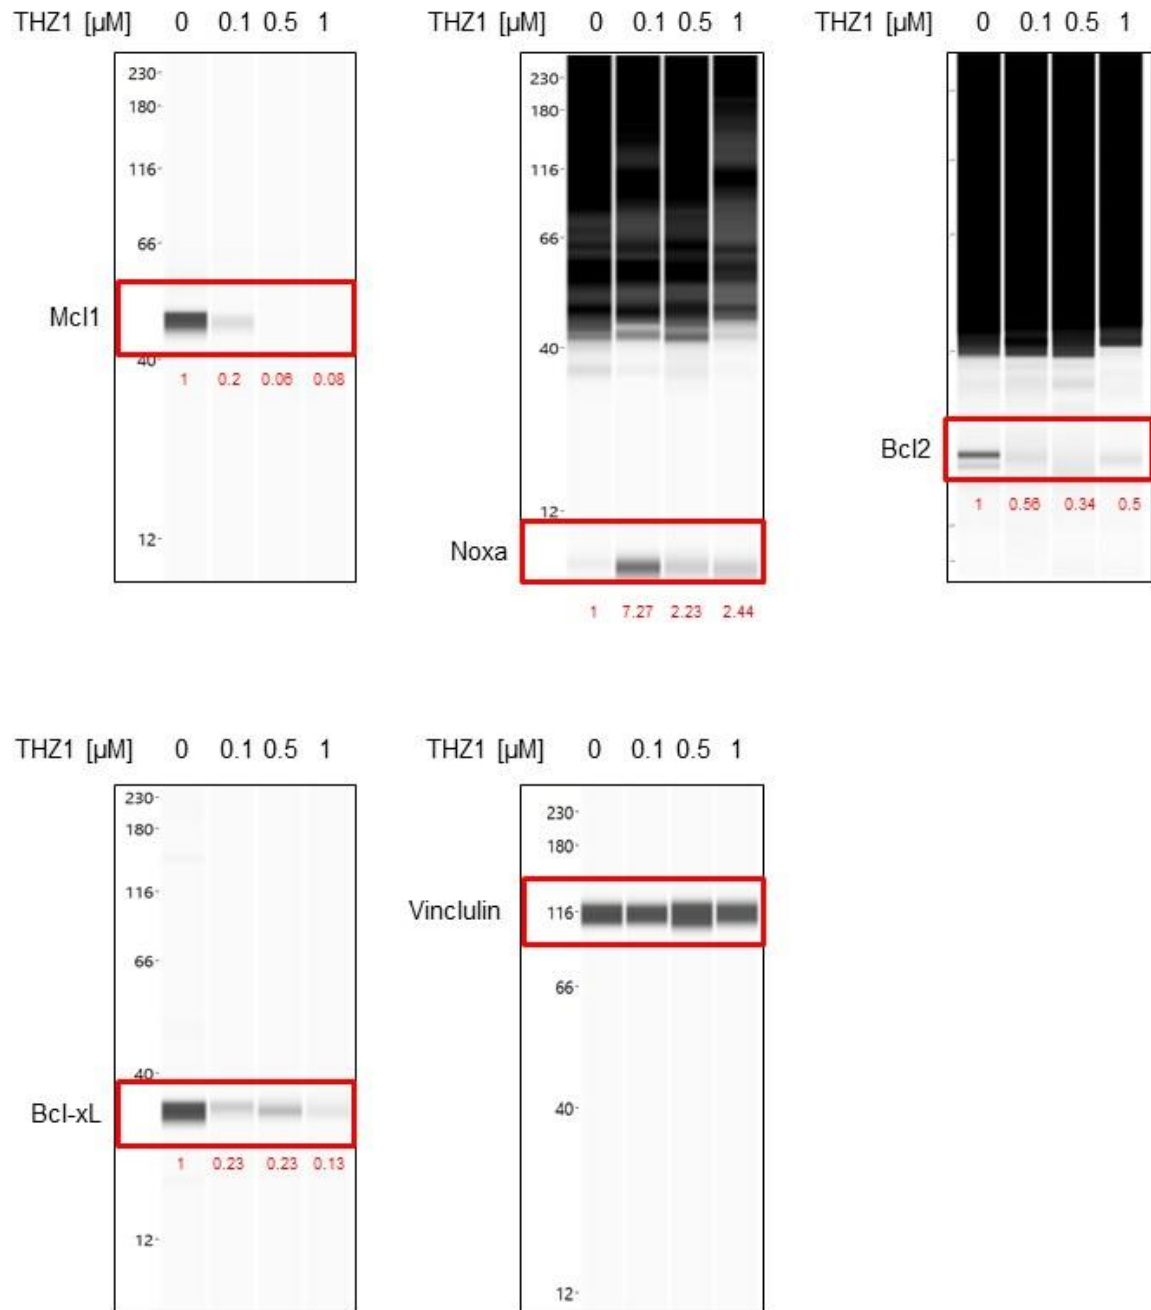

Figure 2f

LN229, 24h

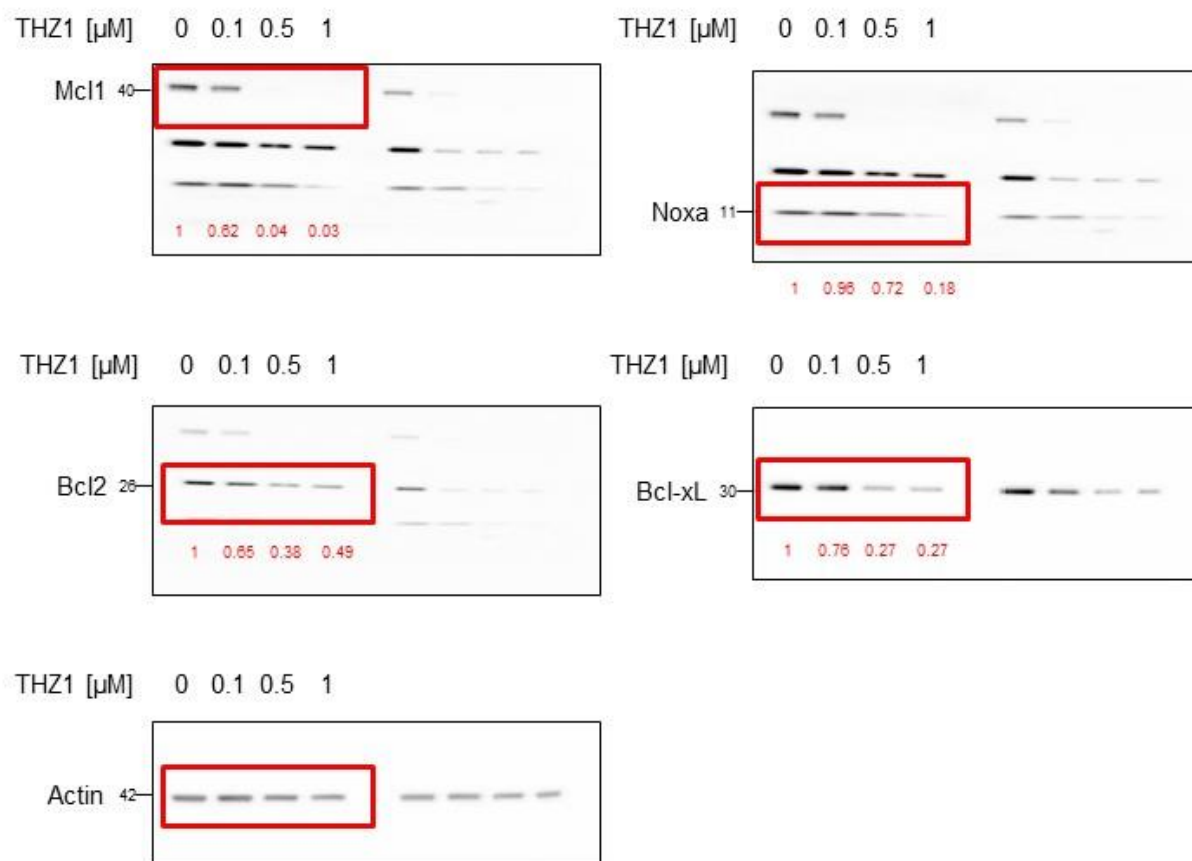

Figure 2f

GBM22, 24h

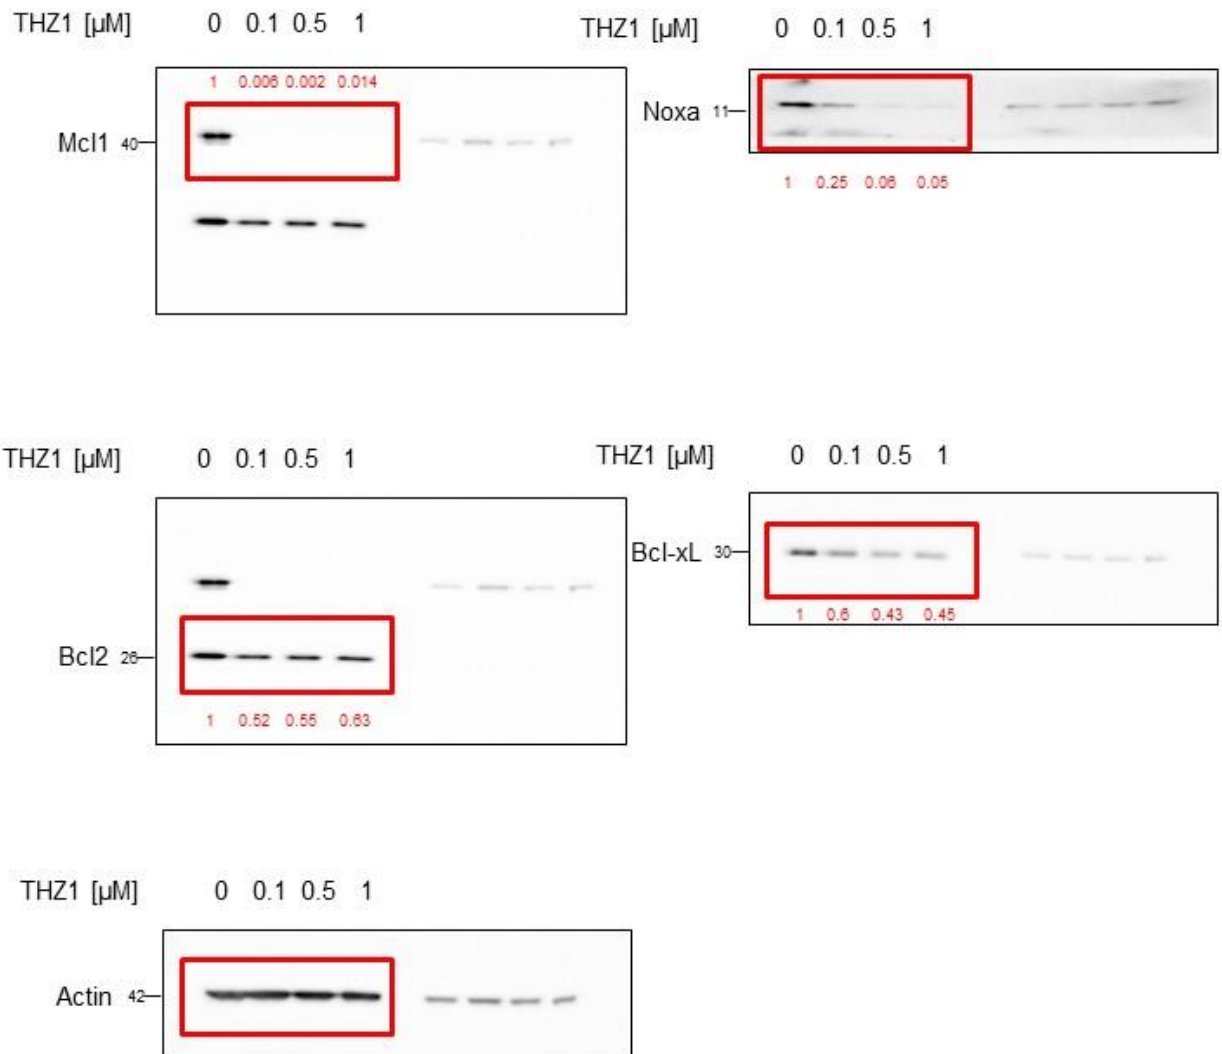

Figure 3d

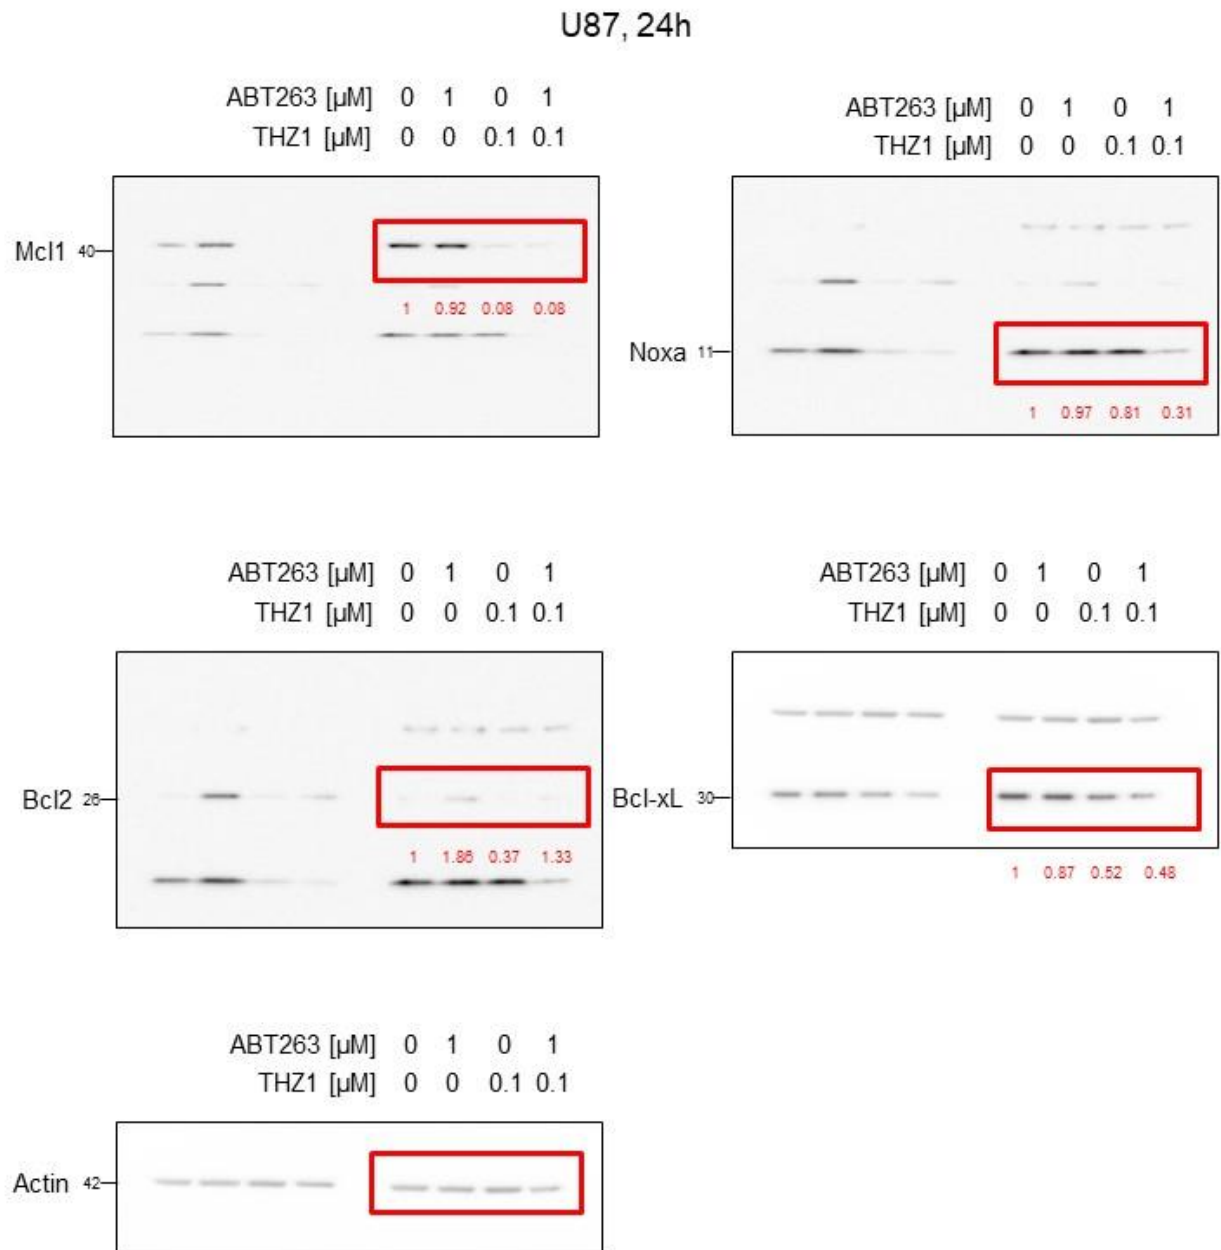

Figure 3d

U251, 24h

ABT263 [ $\mu$ M] 0 1 0 1  
THZ1 [ $\mu$ M] 0 0 0.1 0.1

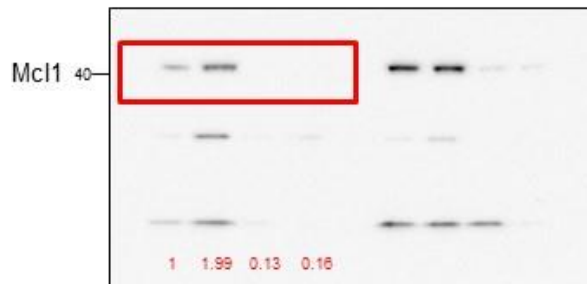

ABT263 [ $\mu$ M] 0 1 0 1  
THZ1 [ $\mu$ M] 0 0 0.1 0.1

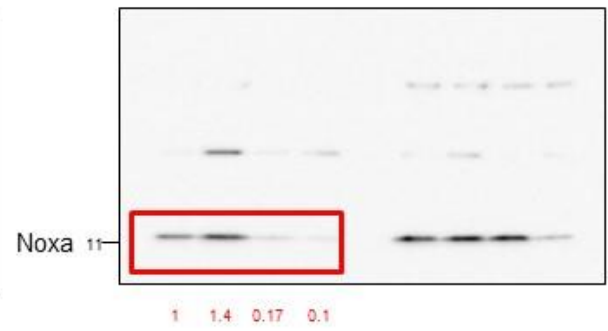

ABT263 [ $\mu$ M] 0 1 0 1  
THZ1 [ $\mu$ M] 0 0 0.1 0.1

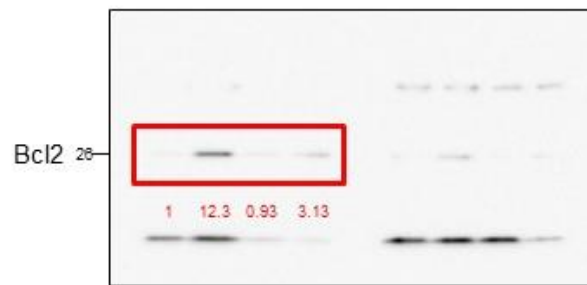

ABT263 [ $\mu$ M] 0 1 0 1  
THZ1 [ $\mu$ M] 0 0 0.1 0.1

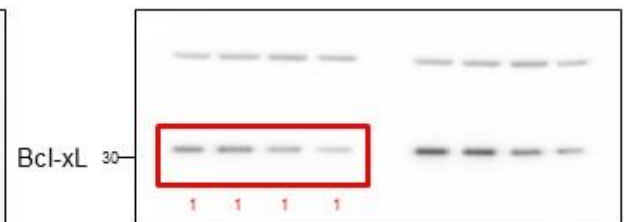

ABT263 [ $\mu$ M] 0 1 0 1  
THZ1 [ $\mu$ M] 0 0 0.1 0.1

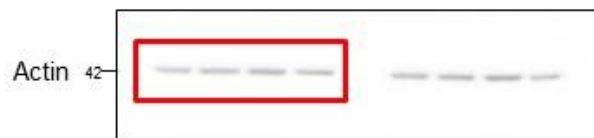

Figure 3d

LN229, 24h

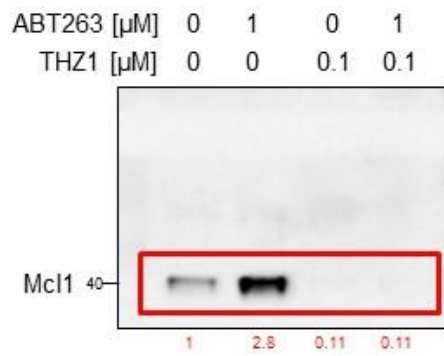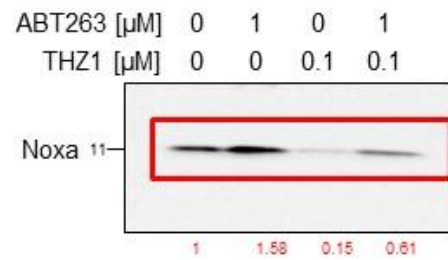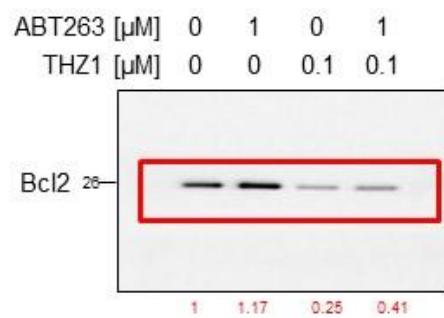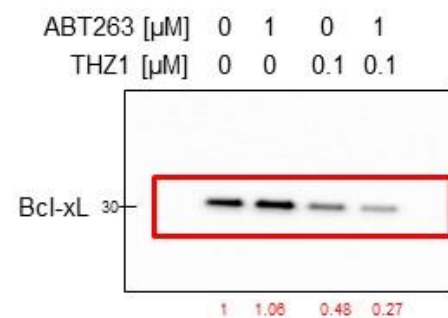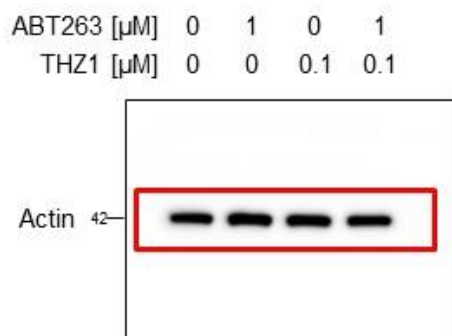



Figure 3d

GBM22, 24h

ABT263 [ $\mu$ M] 0 1 0 1  
THZ1 [ $\mu$ M] 0 0 0.1 0.1

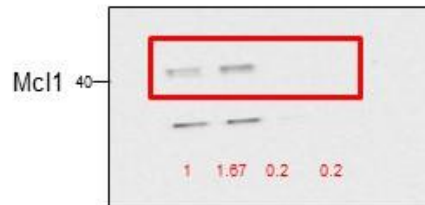

ABT263 [ $\mu$ M] 0 1 0 1  
THZ1 [ $\mu$ M] 0 0 0.1 0.1

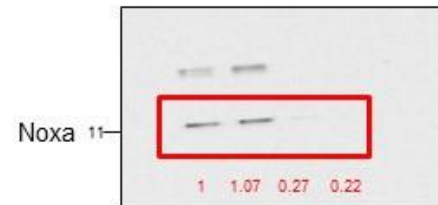

ABT263 [ $\mu$ M] 0 1 0 1  
THZ1 [ $\mu$ M] 0 0 0.1 0.1

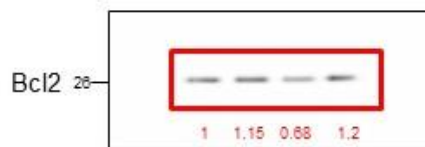

ABT263 [ $\mu$ M] 0 1 0 1  
THZ1 [ $\mu$ M] 0 0 0.1 0.1

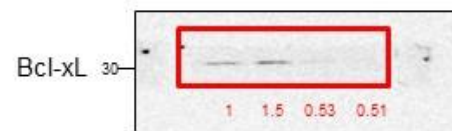

ABT263 [ $\mu$ M] 0 1 0 1  
THZ1 [ $\mu$ M] 0 0 0.1 0.1

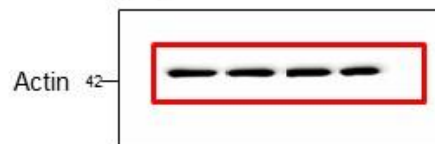

Figure 4e

U87, 24h

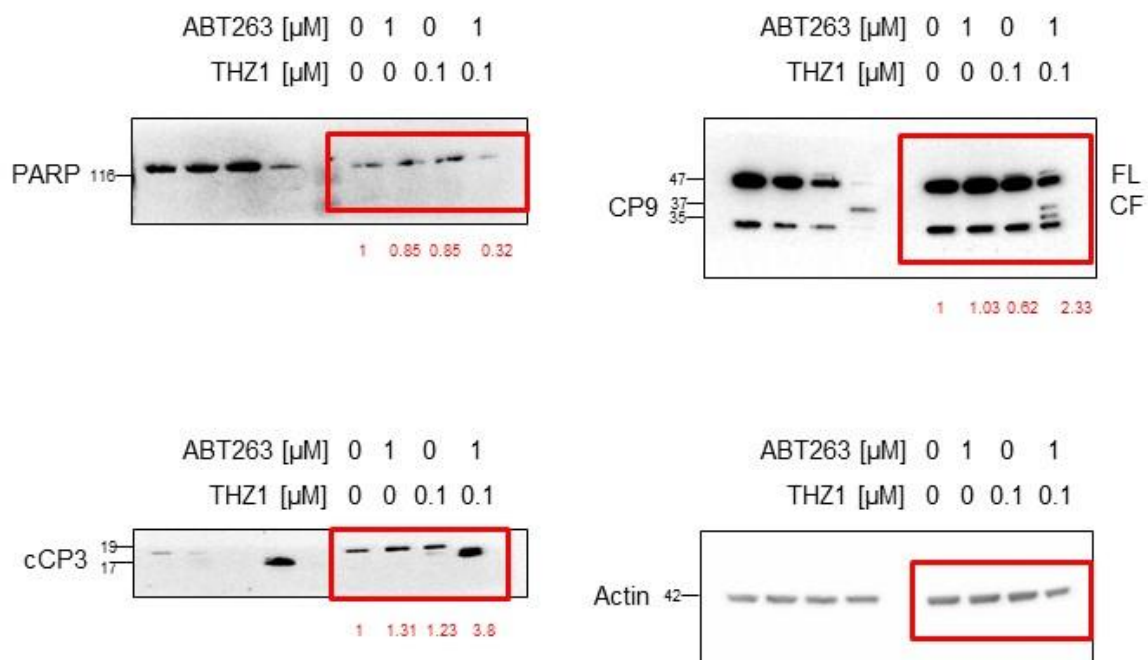

Figure 4e

U251, 24h

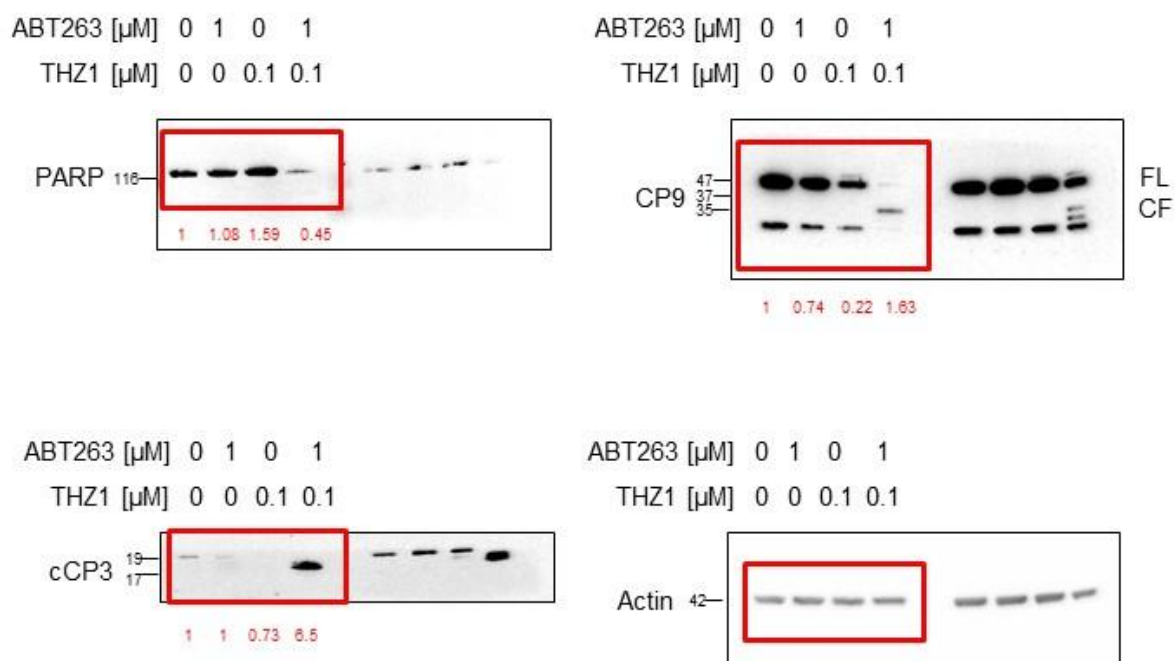

Figure 5c

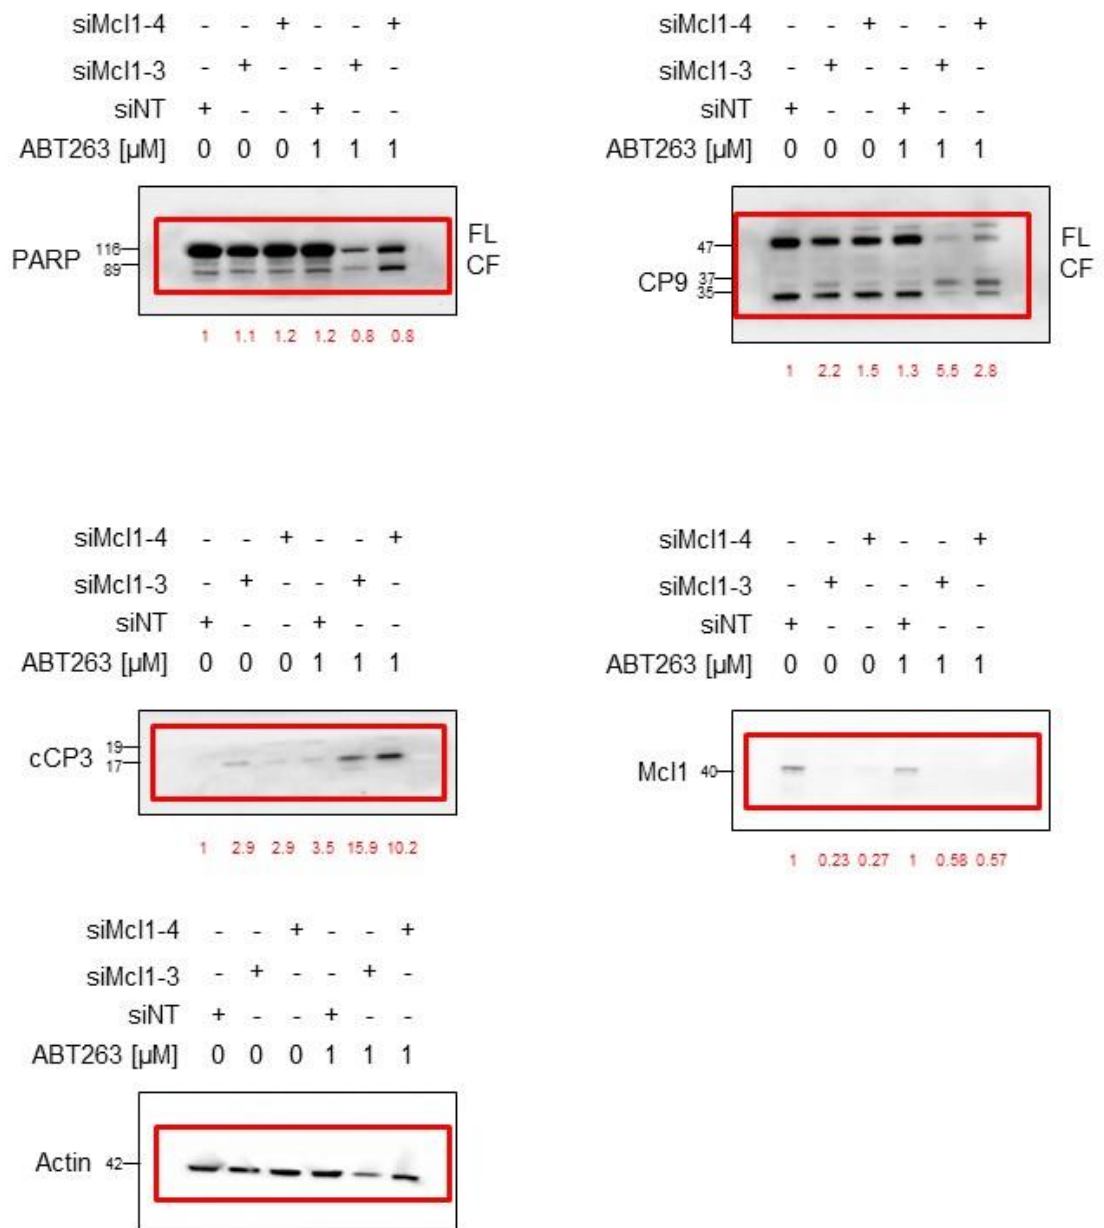

Figure S1d

GBM12, 24h

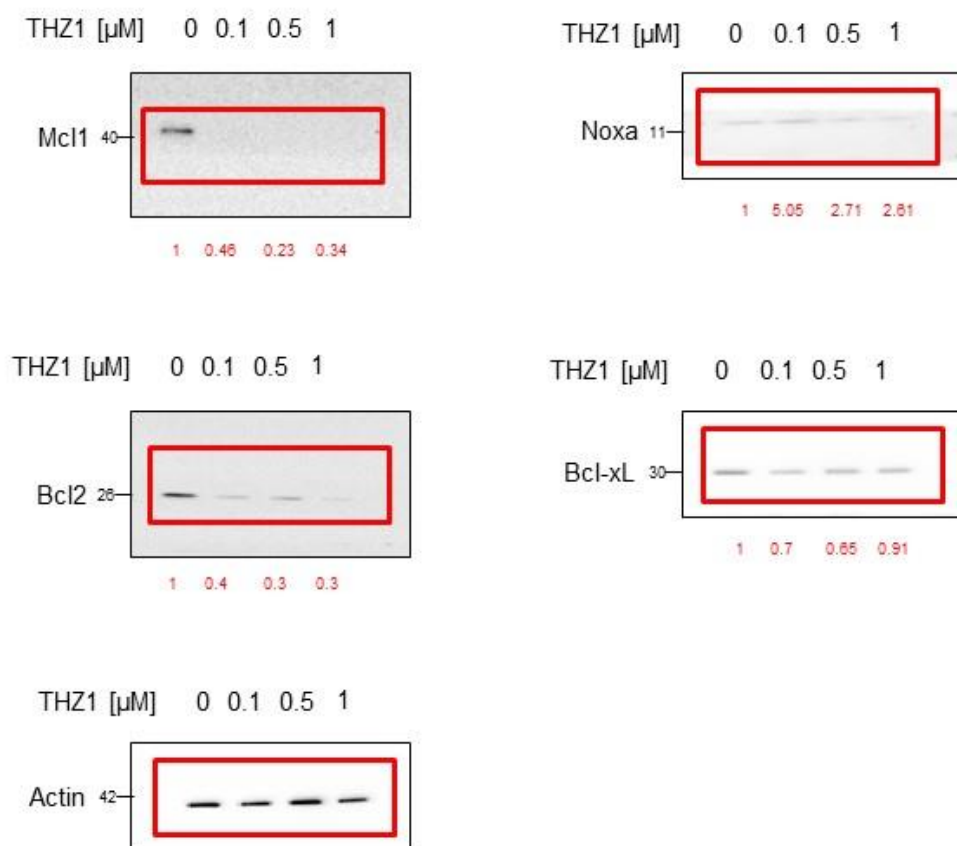

Figure S1d

KNS42, 24h

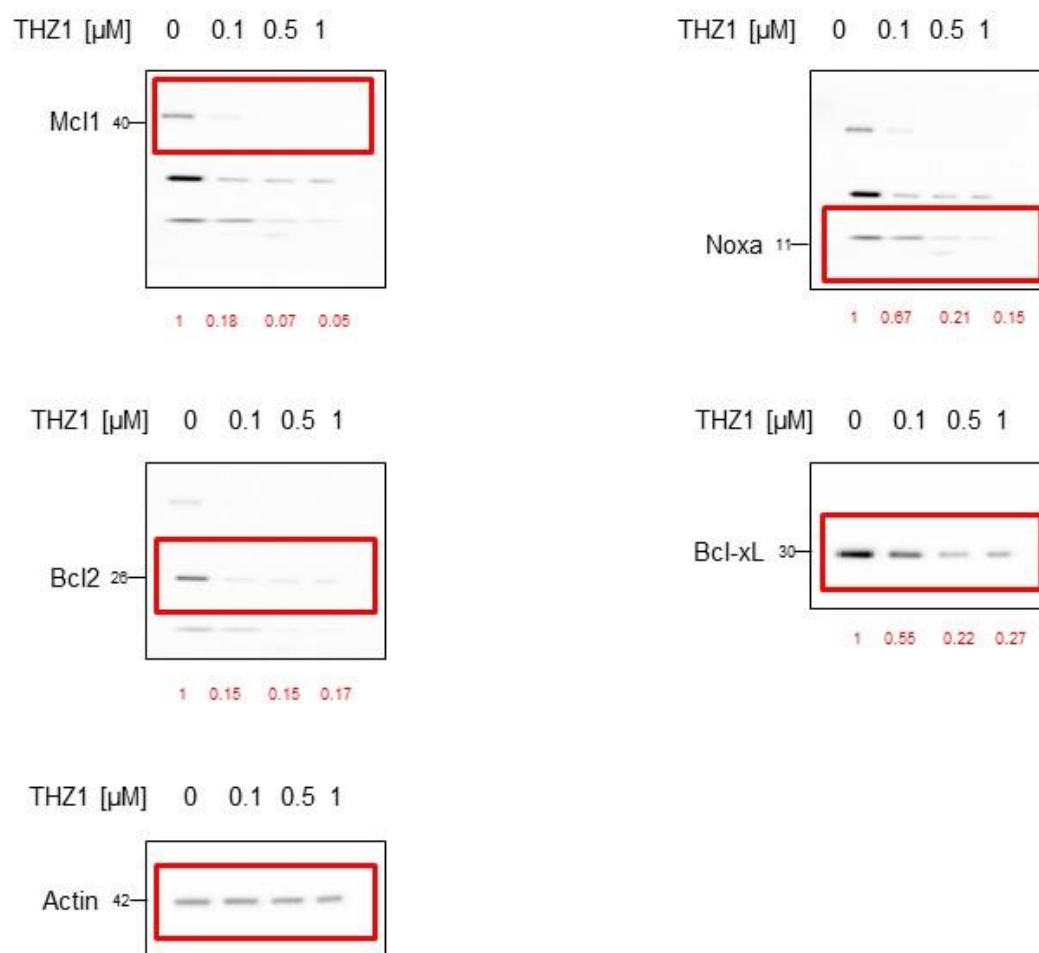

Figure S5d

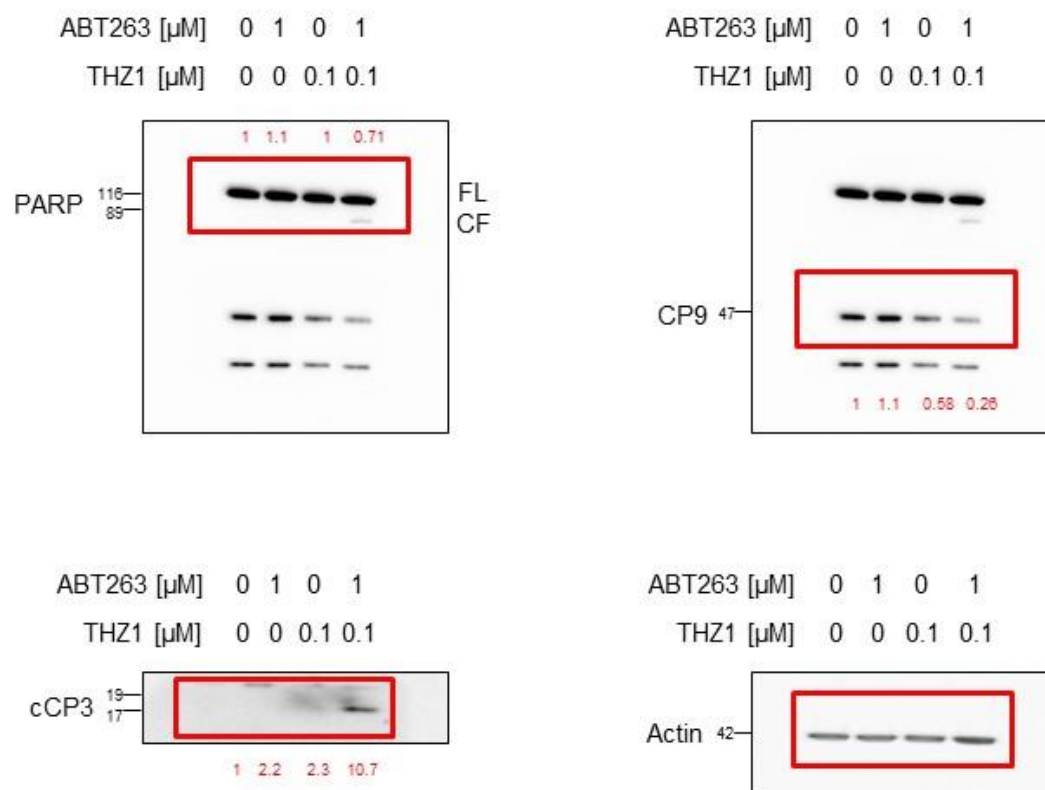

Figure S6h

U251, 24h

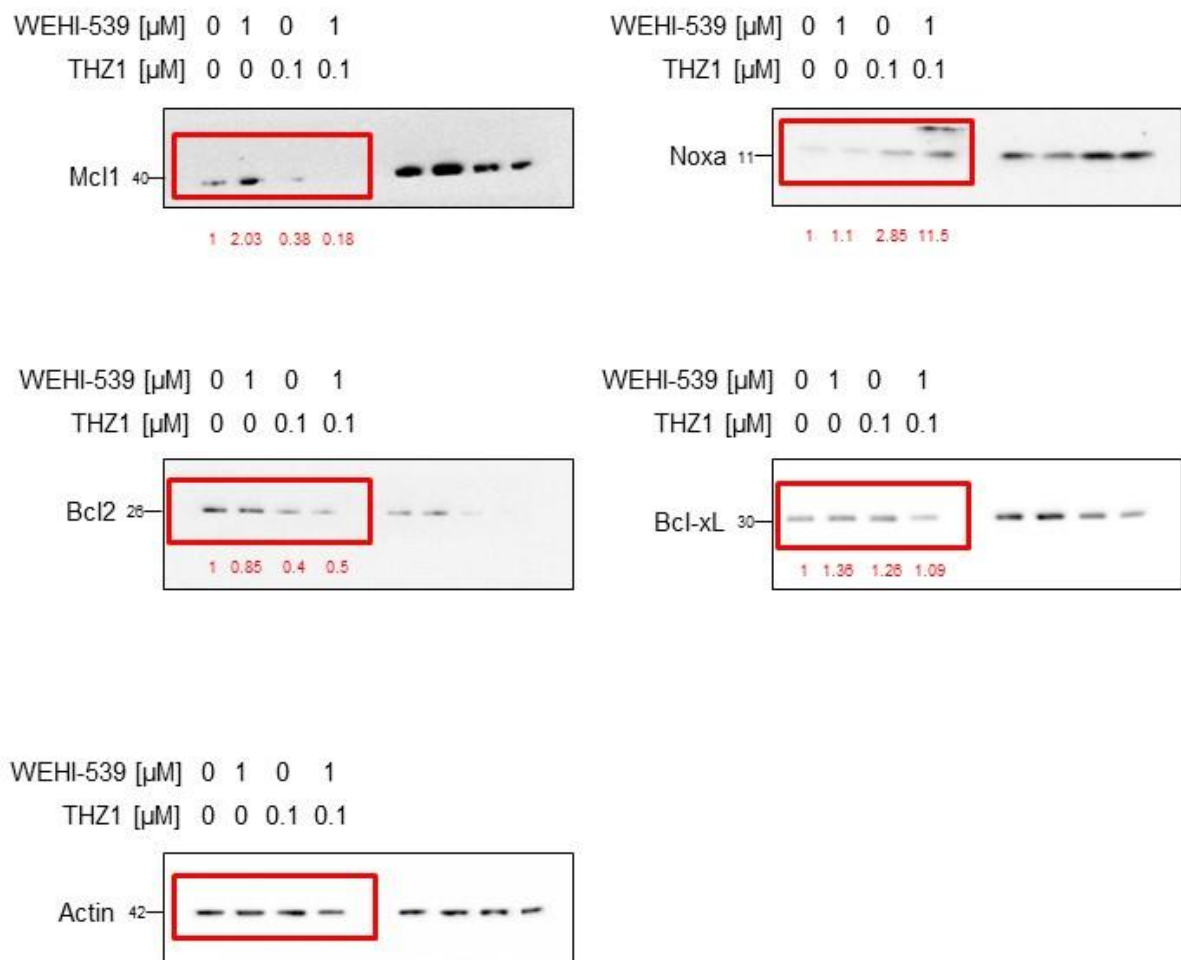

Figure S6h

U87, 24h

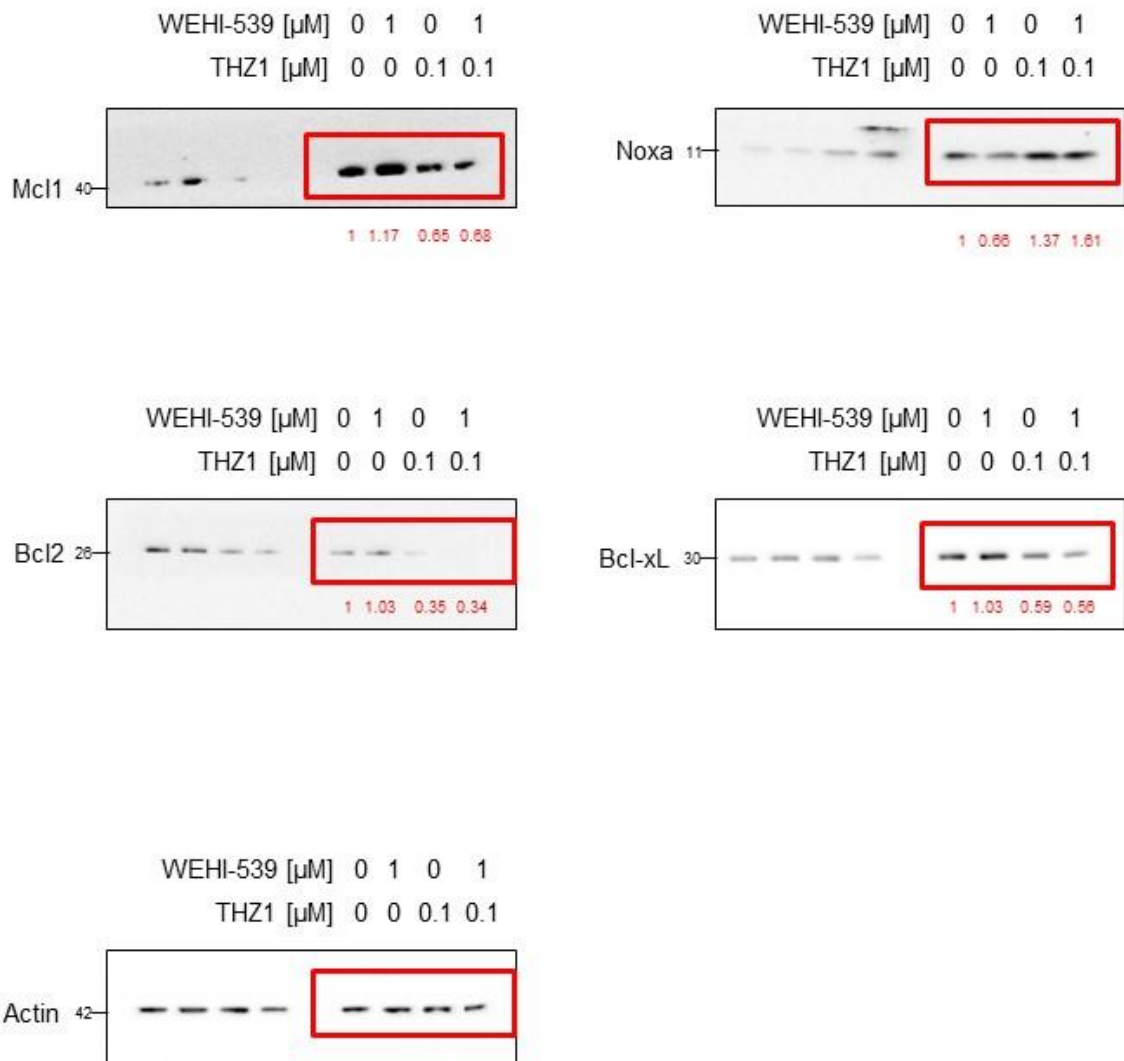



Figure S6i

U251, 24h

WEHI-539 [ $\mu$ M] 0 1 0 1  
THZ1 [ $\mu$ M] 0 0 0.1 0.1

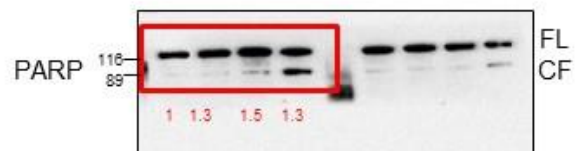

WEHI-539 [ $\mu$ M] 0 1 0 1  
THZ1 [ $\mu$ M] 0 0 0.1 0.1

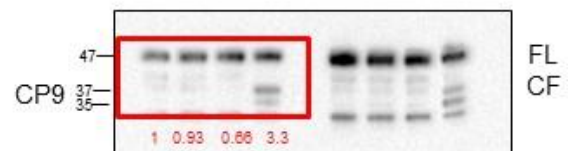

WEHI-539 [ $\mu$ M] 0 1 0 1  
THZ1 [ $\mu$ M] 0 0 0.1 0.1

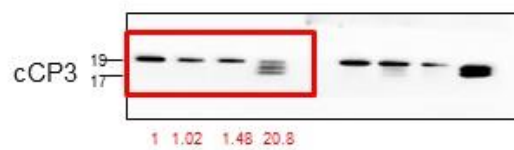

WEHI-539 [ $\mu$ M] 0 1 0 1  
THZ1 [ $\mu$ M] 0 0 0.1 0.1

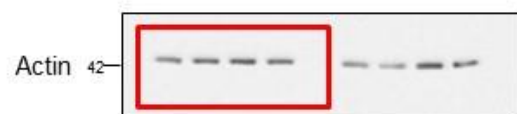

Figure S6i

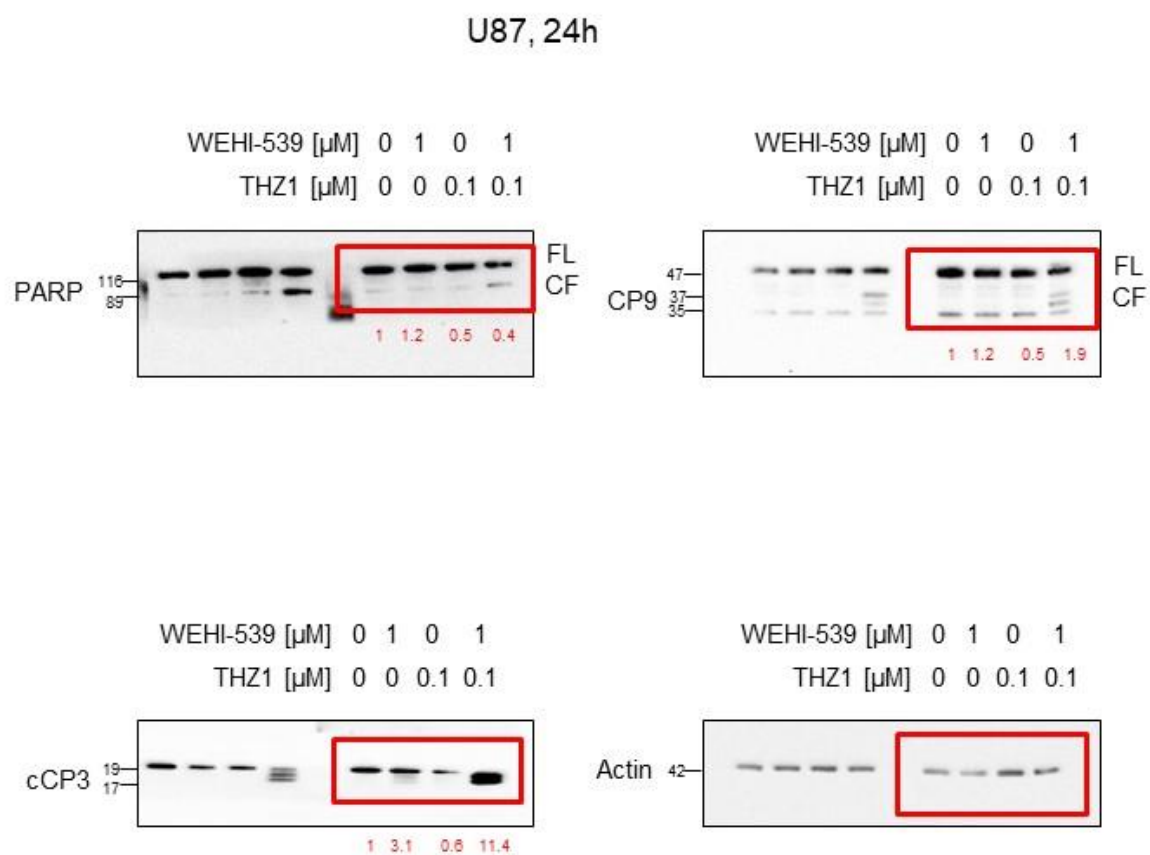

Figure S7a

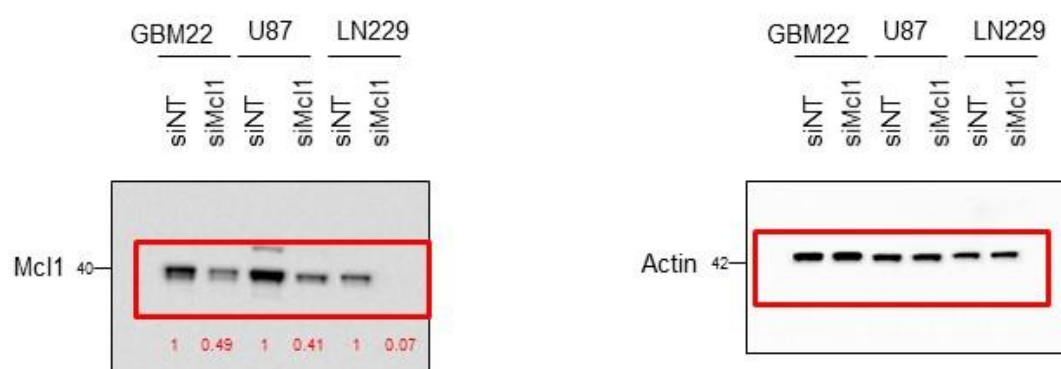

Supplement: s1 [file s1]
